# Supplementary material
Source: PubMed Central journal article supplement (PMC4459899)

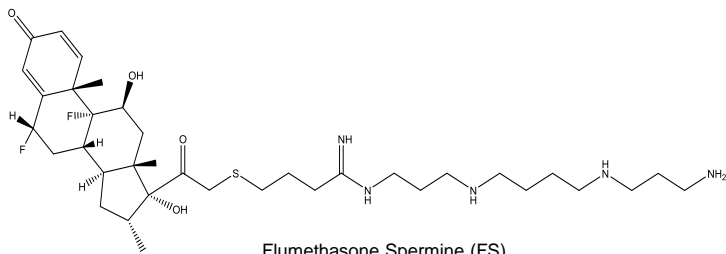

Flumethasone Spermine (FS)  
Molecular Weight: 695.96

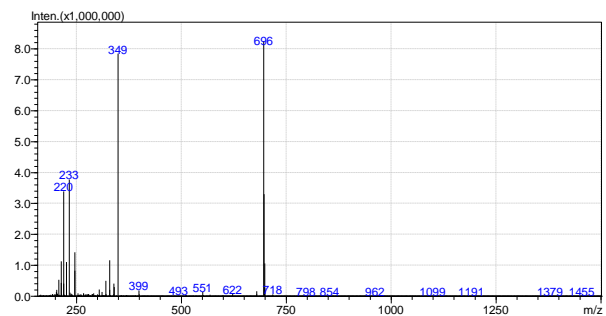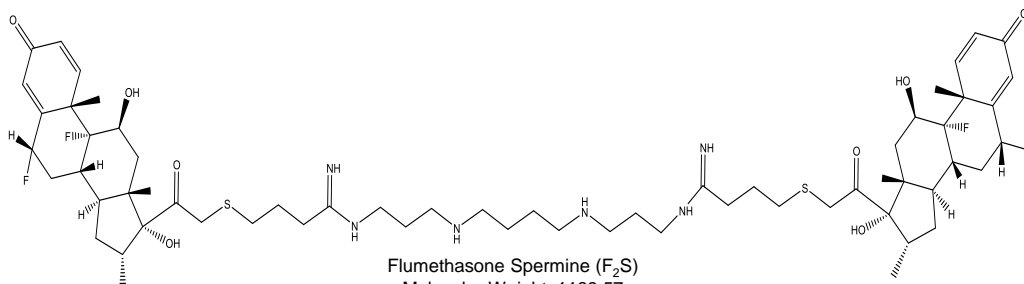

Flumethasone Spermine (F<sub>2</sub>S)  
Molecular Weight: 1189.57

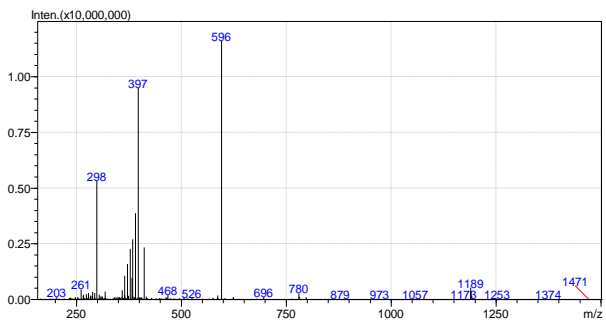

Supplement: NIHMS689743-supplement-1.pdf [file NIHMS689743-supplement-1.pdf]
