# Supplementary material
Source: PubMed Central journal article supplement (PMC4459899)

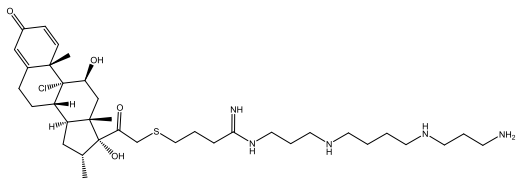

Beclomethasone Spermine (BeS)  
Molecular Weight: 694.42

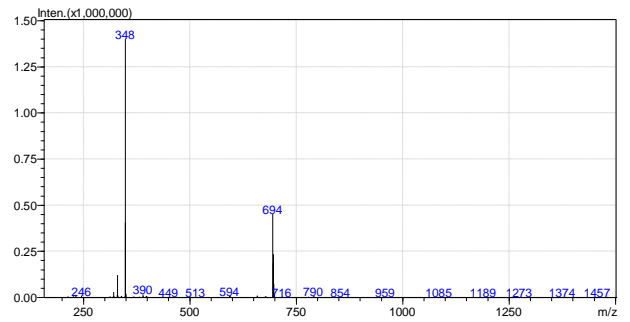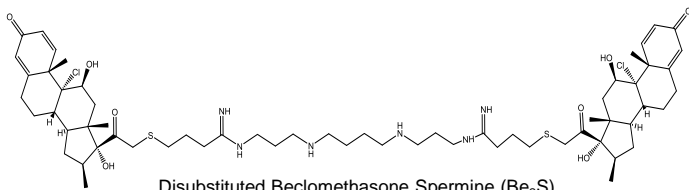

Disubstituted Beclomethasone Spermine (Be<sub>2</sub>S)  
Molecular Weight: 1186.49

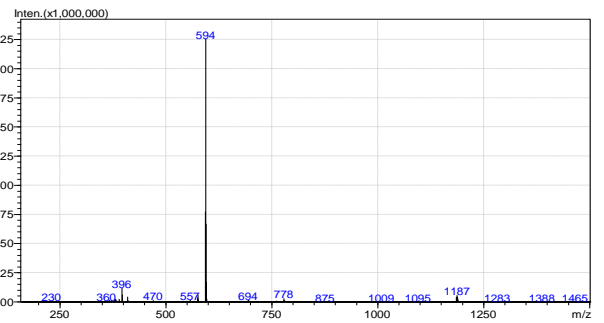

Supplement: NIHMS689743-supplement-3.pdf [file NIHMS689743-supplement-3.pdf]
