# Supplementary material
Source: PubMed Central journal article supplement (PMC4459899)

Flu2S(mm).2.1.1r  
13C NMR

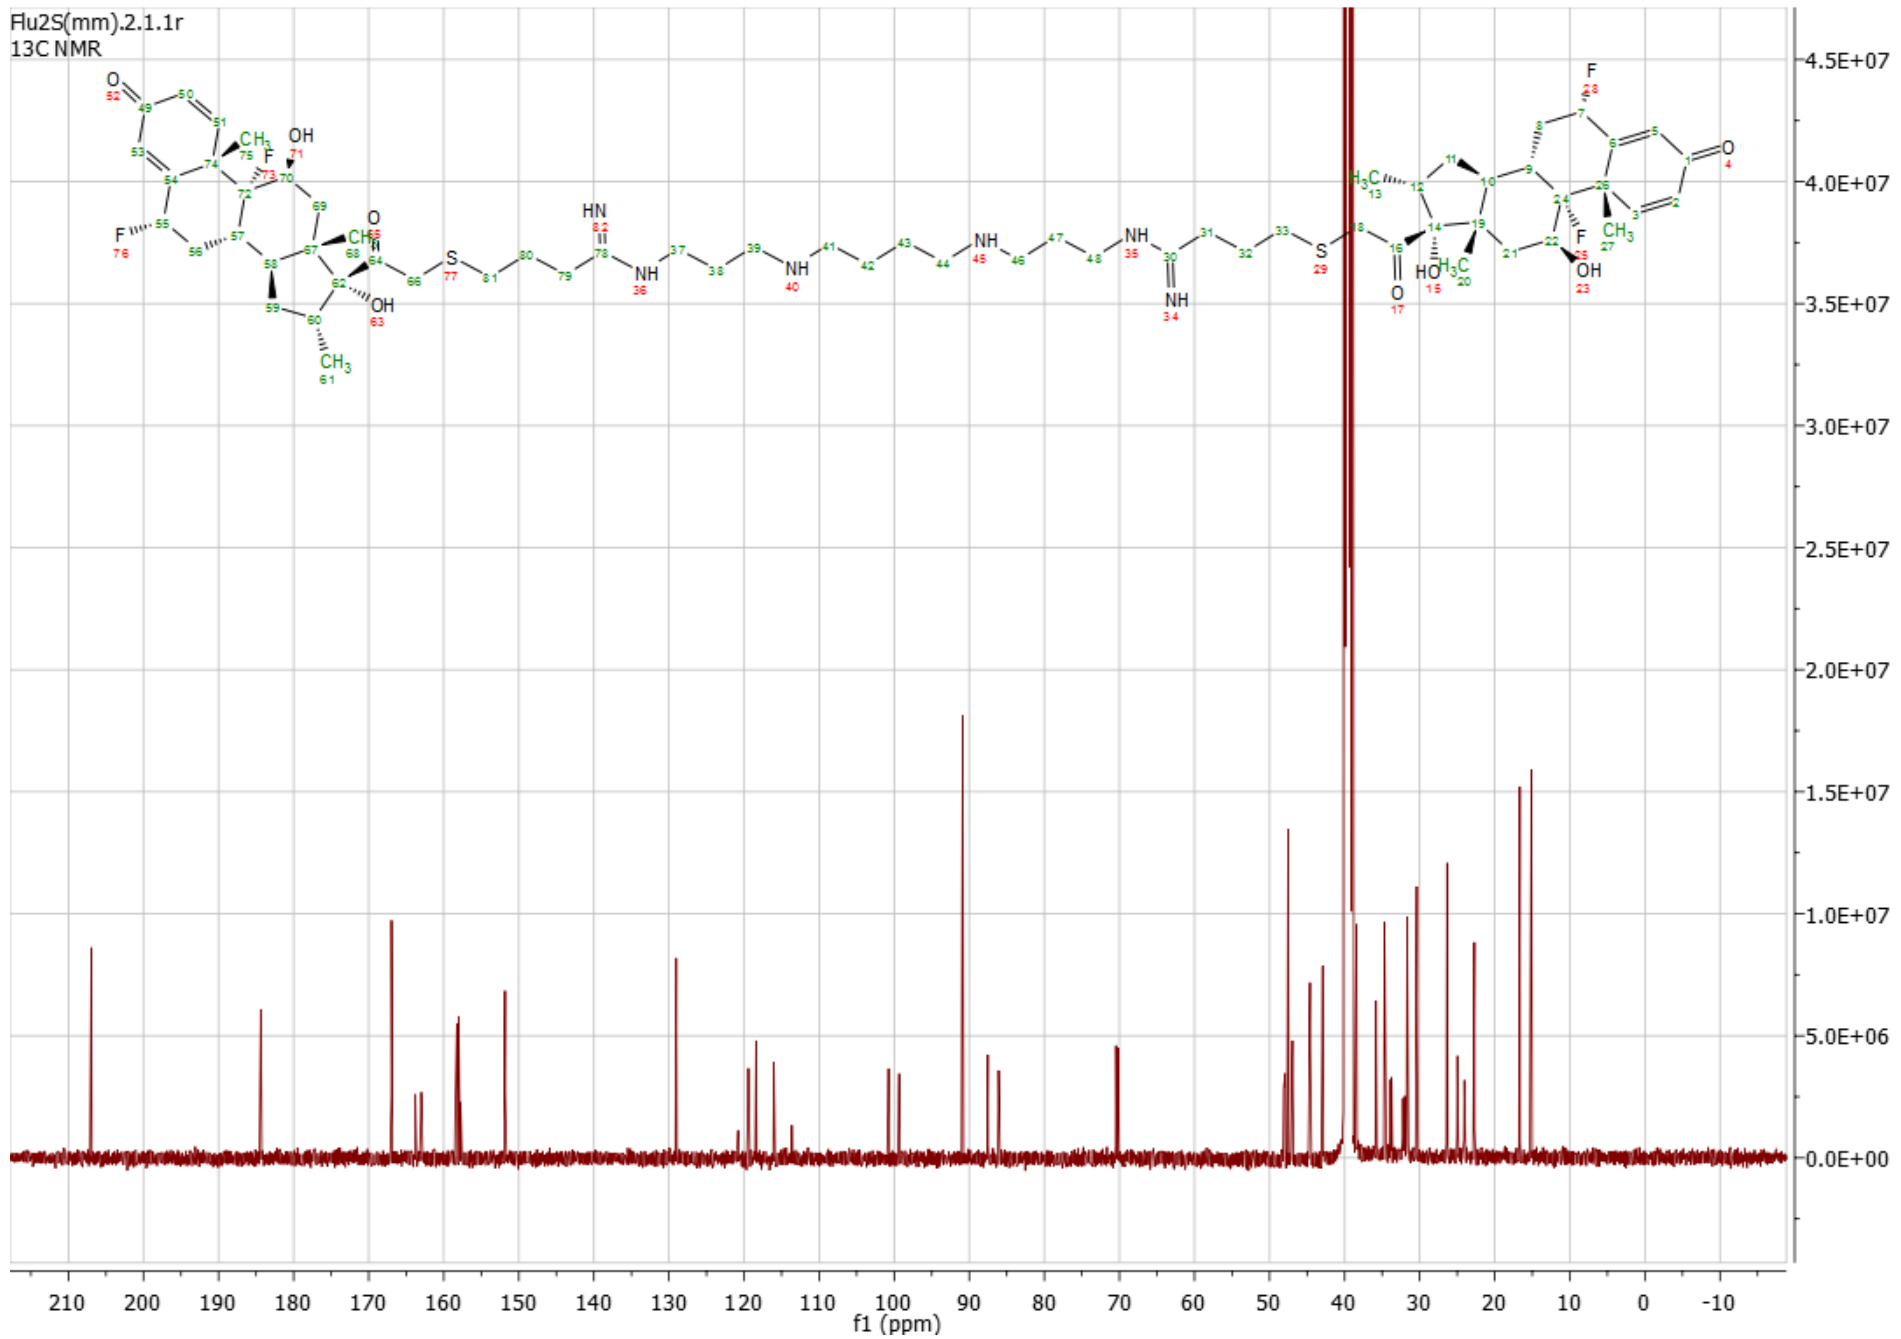

Supplement: NIHMS689743-supplement-11.pdf [file NIHMS689743-supplement-11.pdf]

BuS(mm).4.1.1r  
13C NMR BU(S) MM DMSO

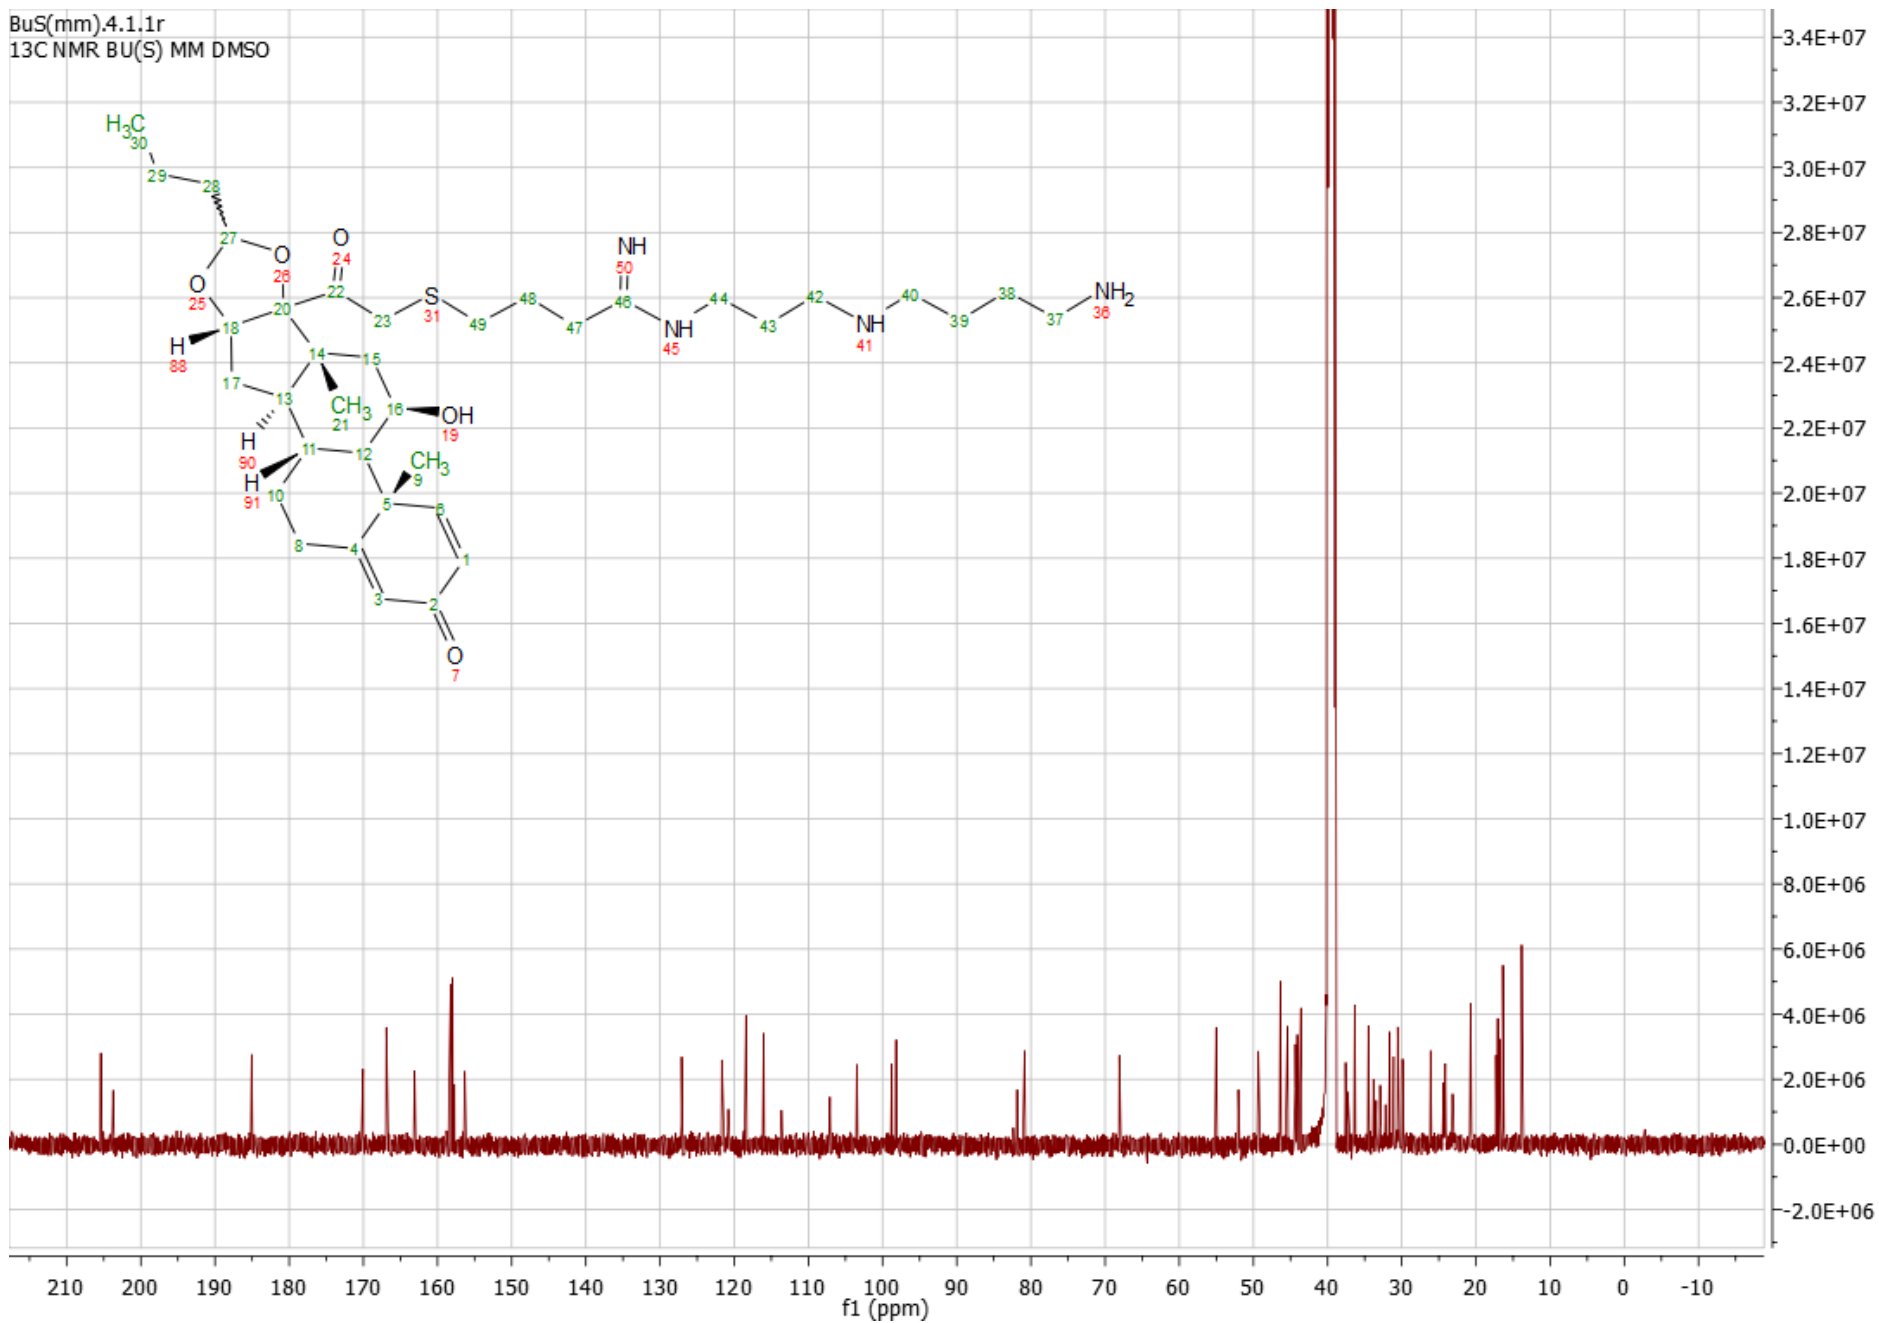

Supplement: NIHMS689743-supplement-12.pdf [file NIHMS689743-supplement-12.pdf]

Bu2S(mm).4.1.ir  
13C NMR

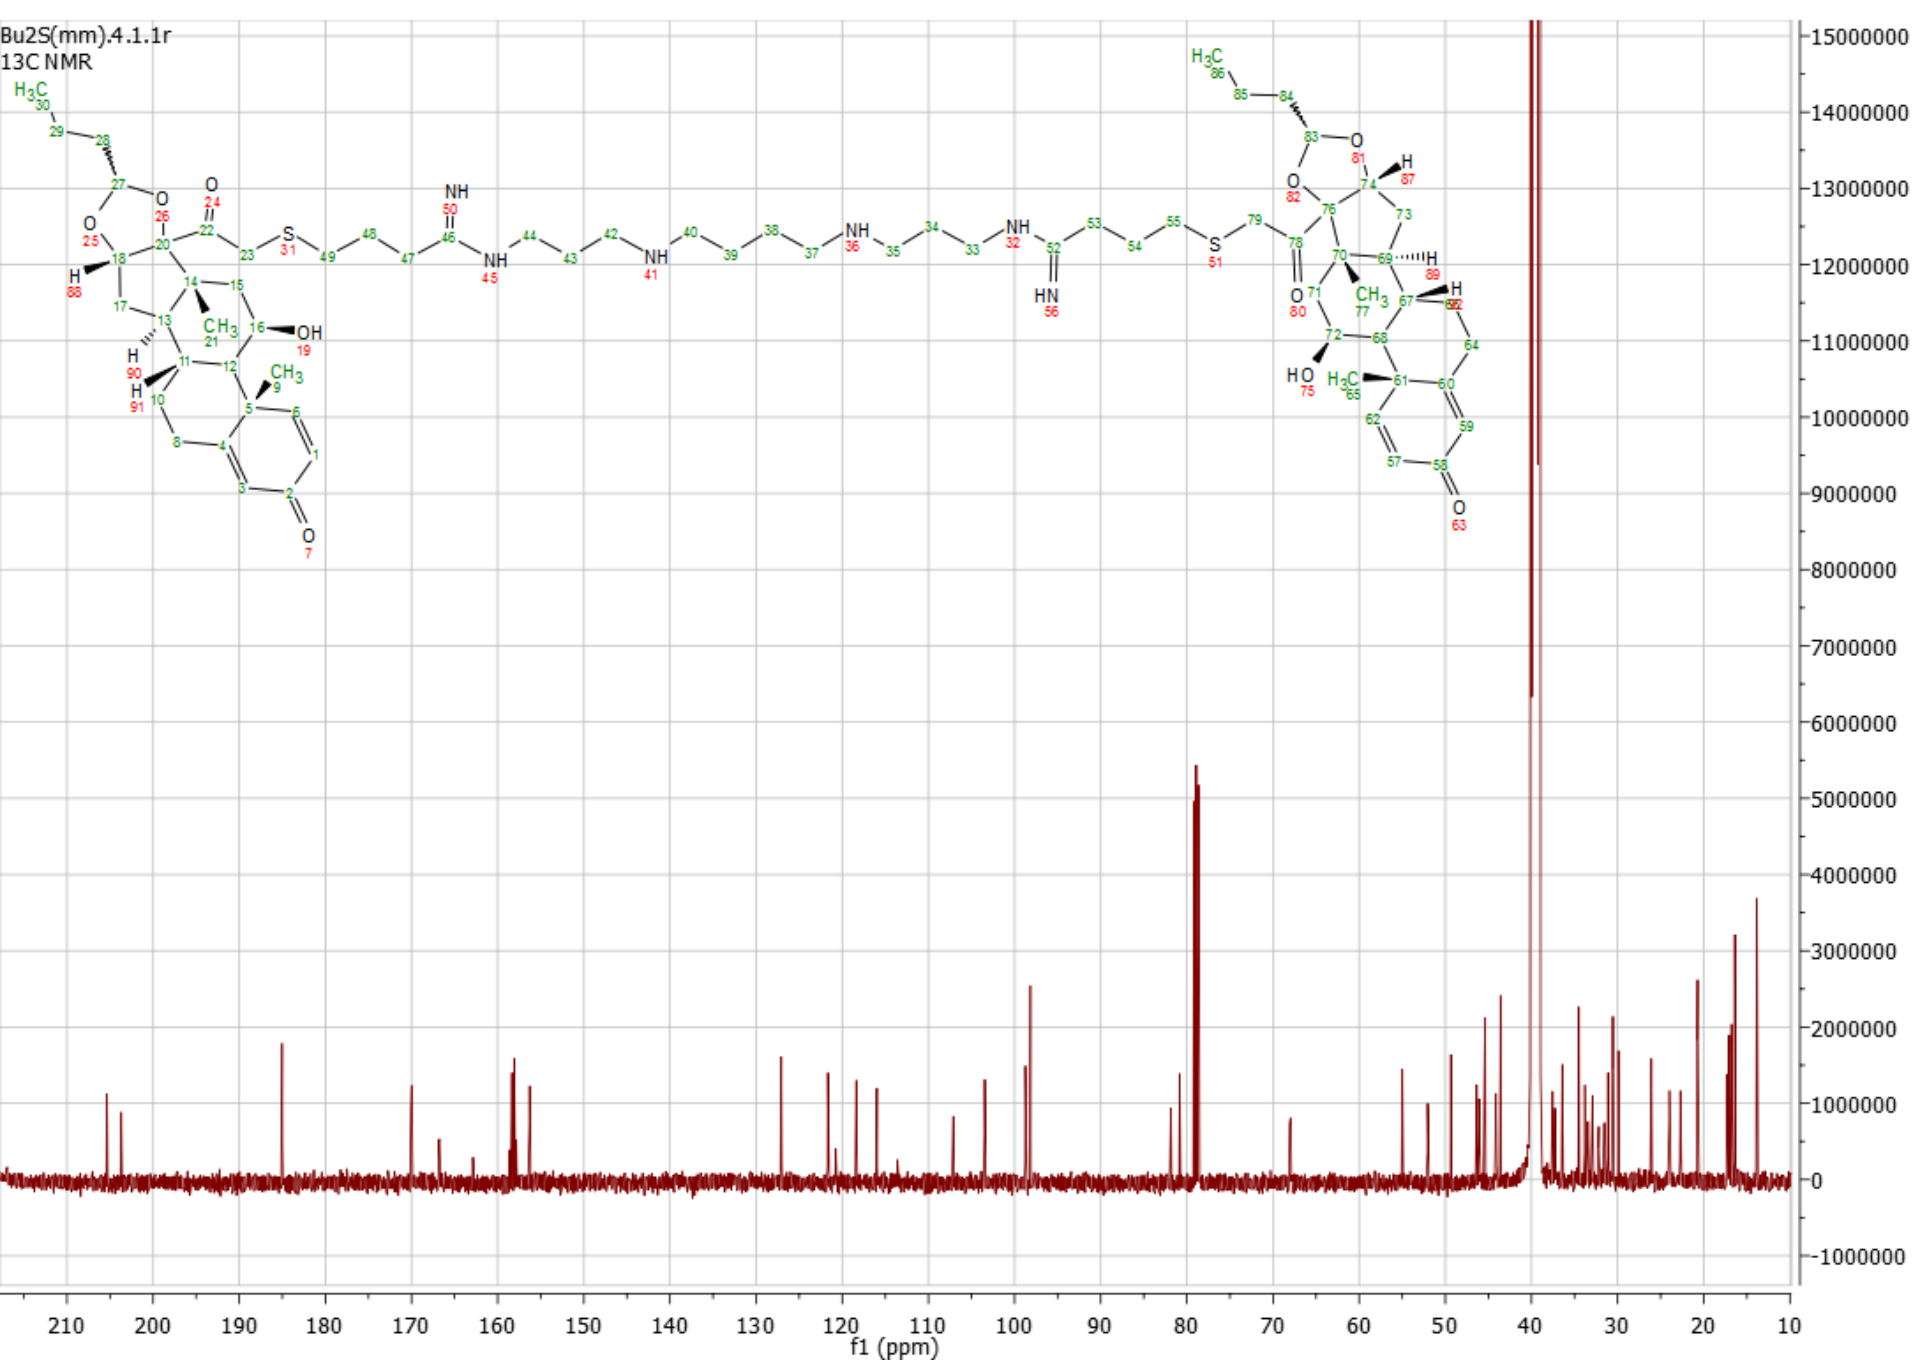

Supplement: NIHMS689743-supplement-13.pdf [file NIHMS689743-supplement-13.pdf]

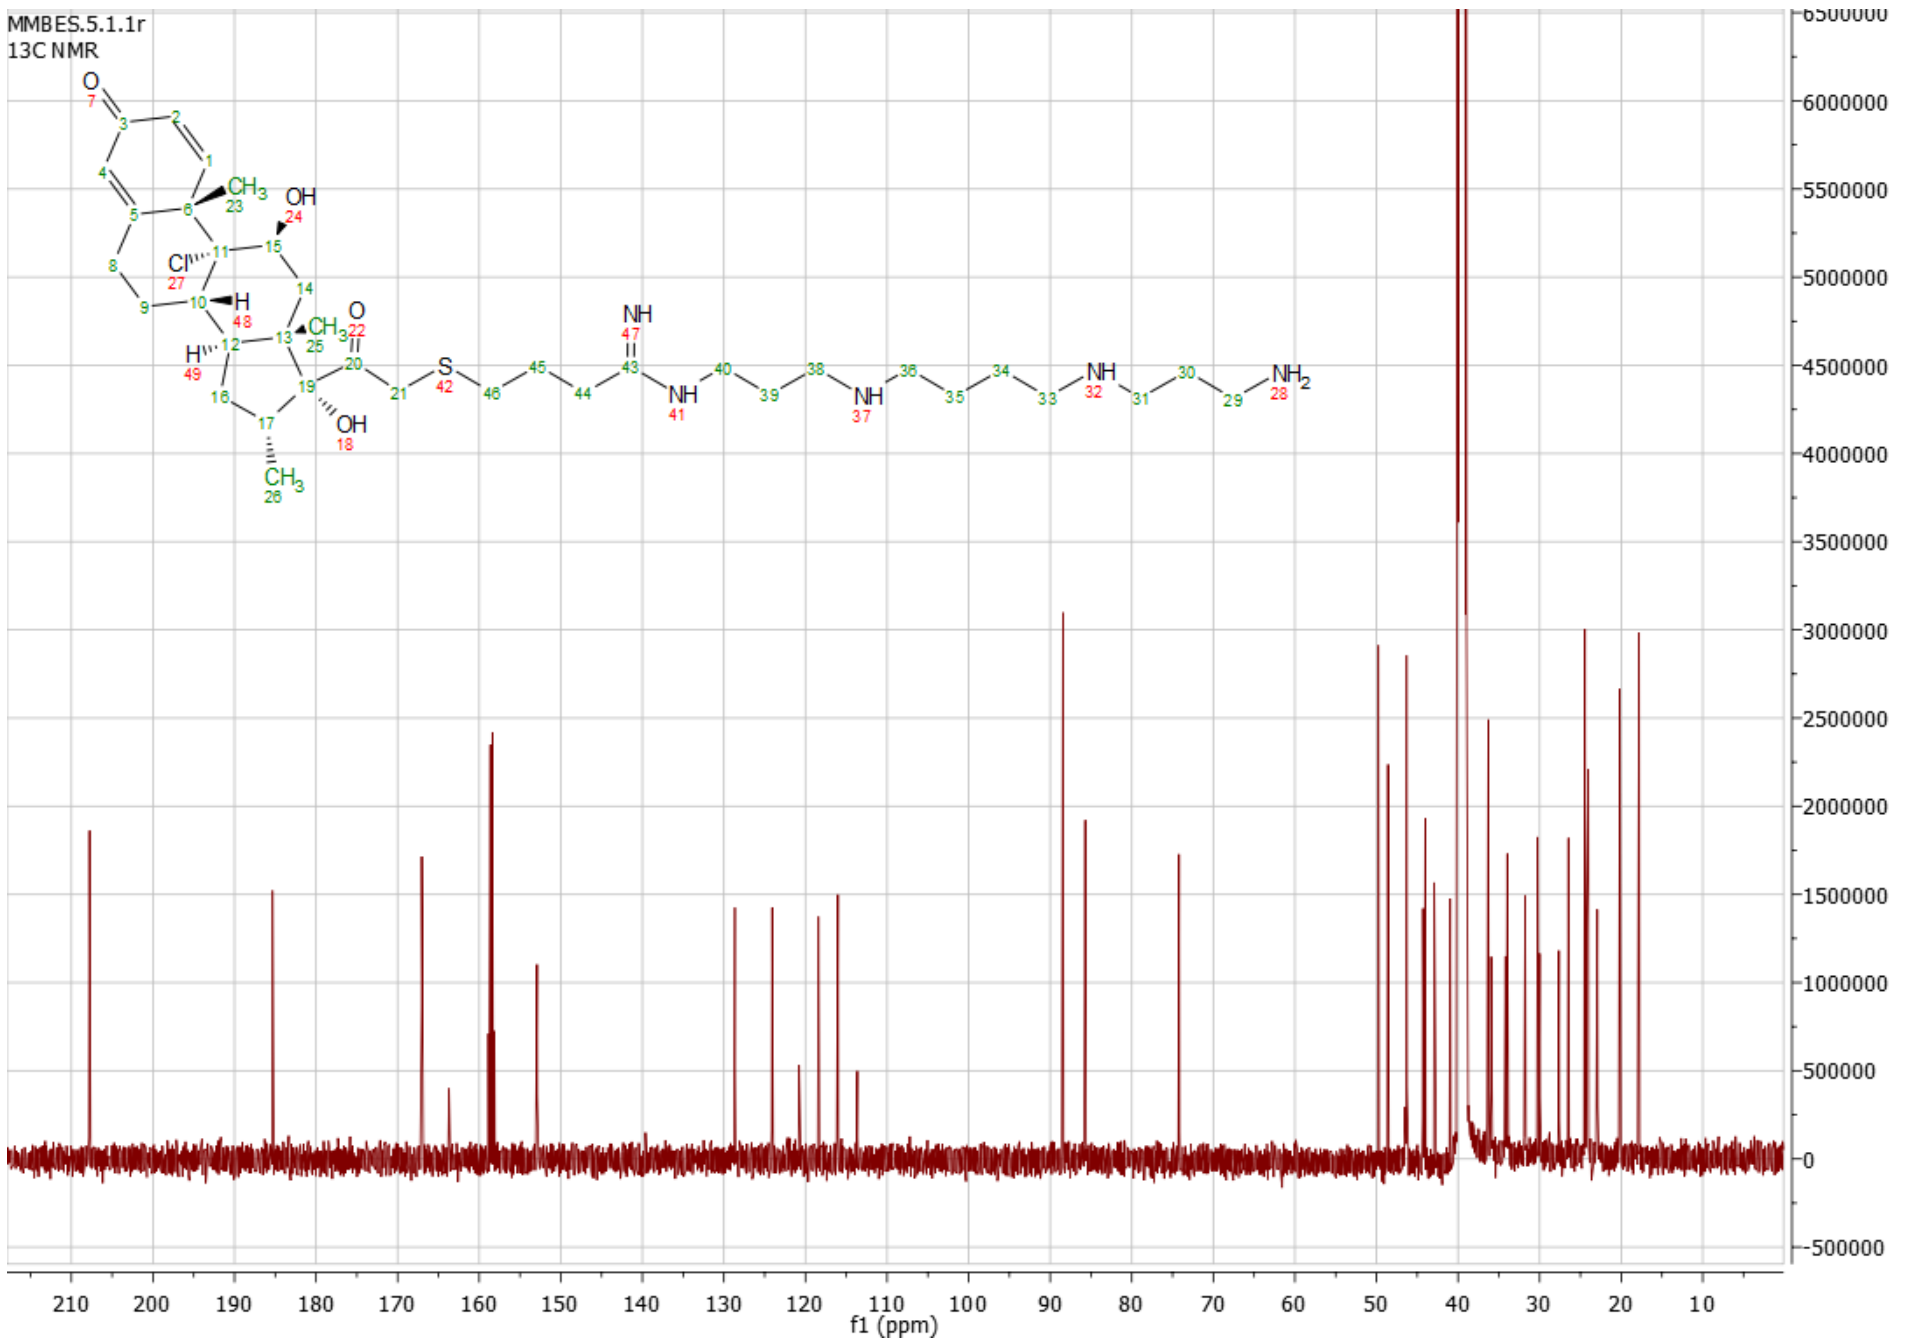

Supplement: NIHMS689743-supplement-14.pdf [file NIHMS689743-supplement-14.pdf]

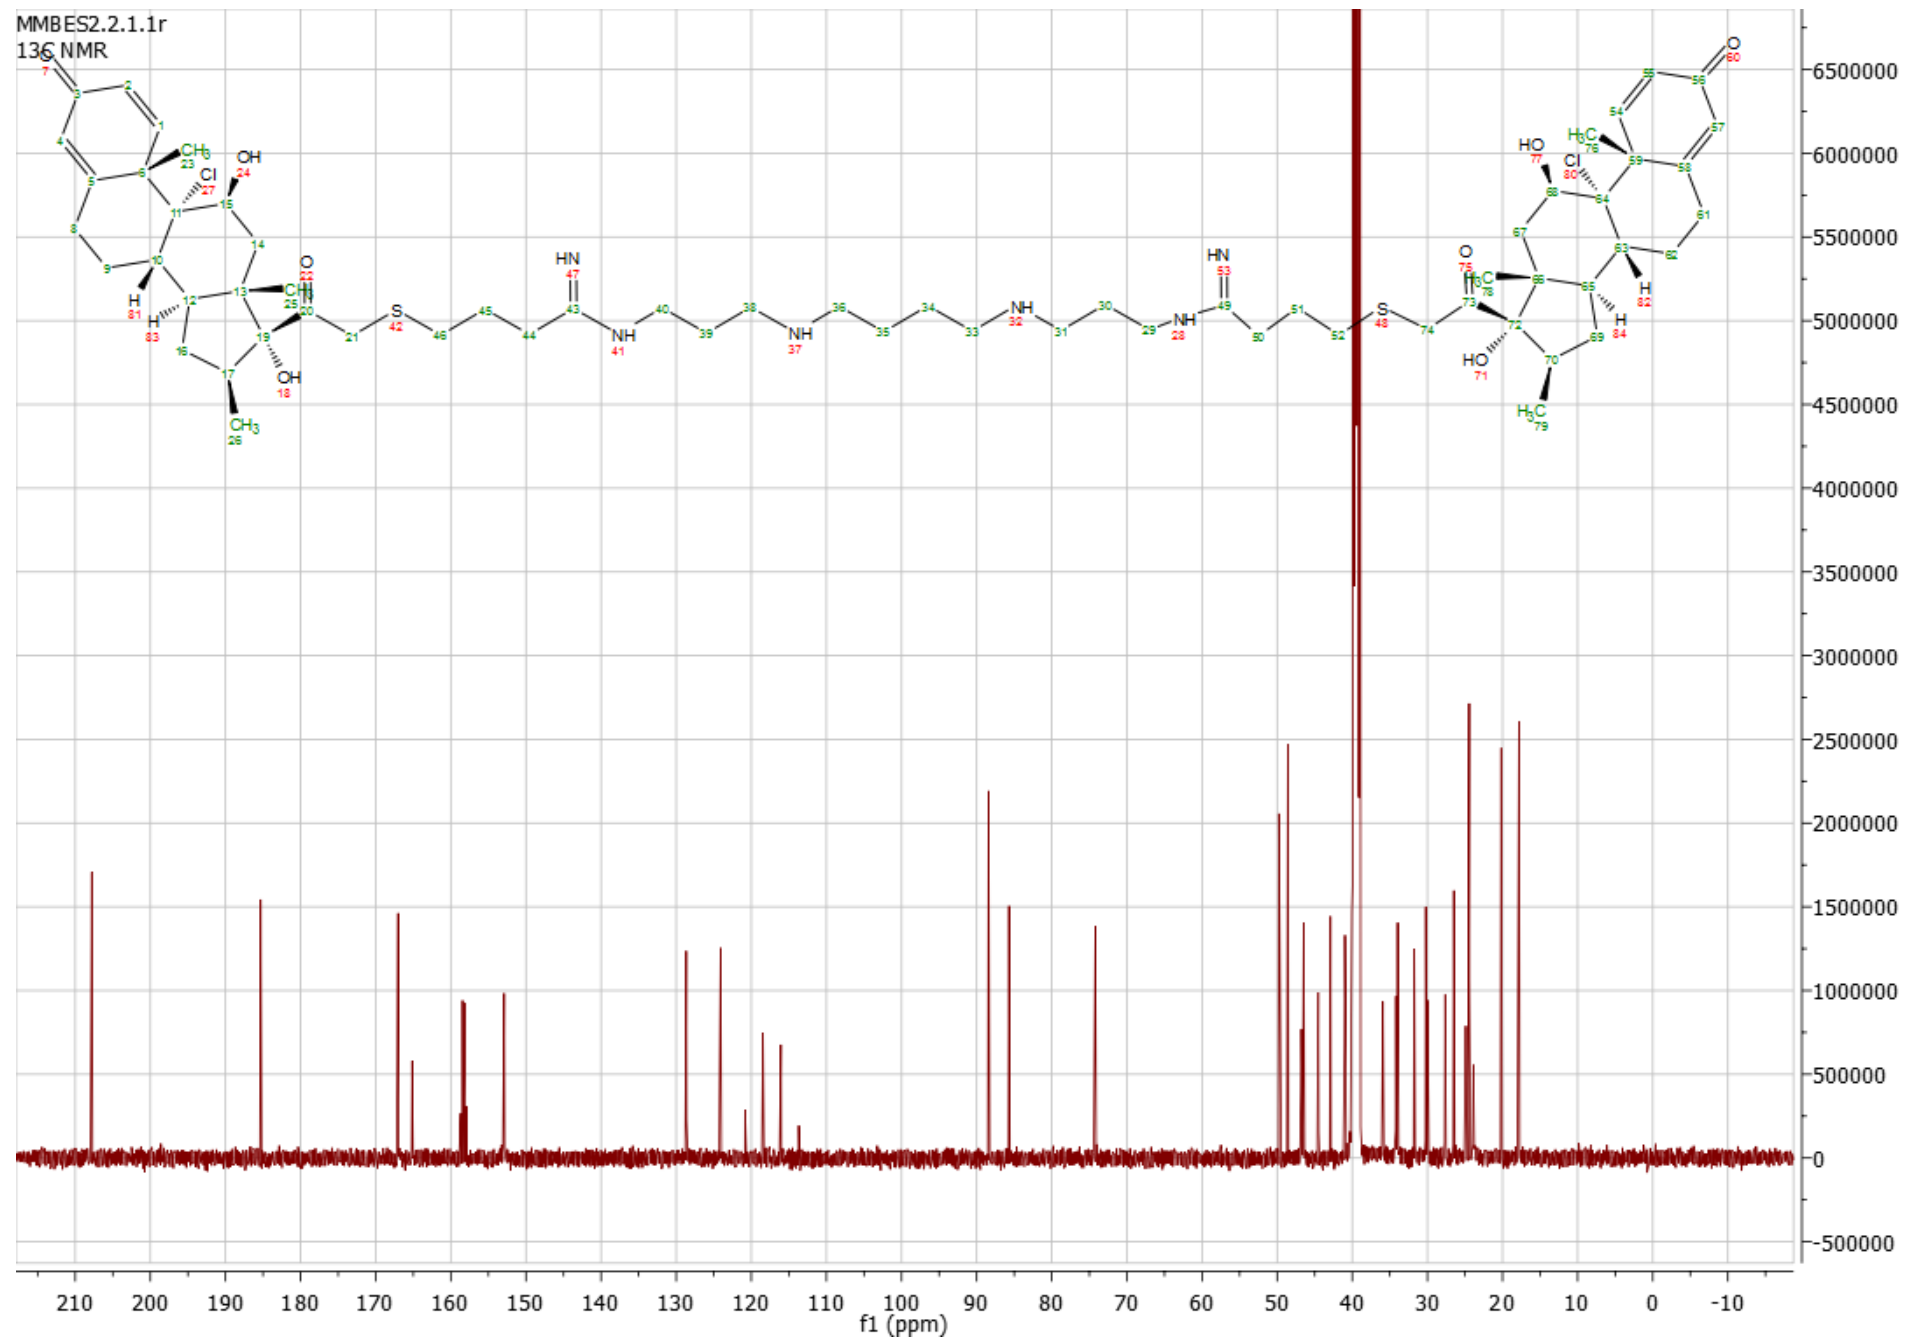

Supplement: NIHMS689743-supplement-15.pdf [file NIHMS689743-supplement-15.pdf]

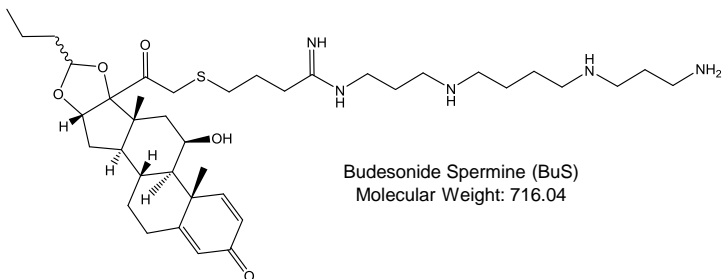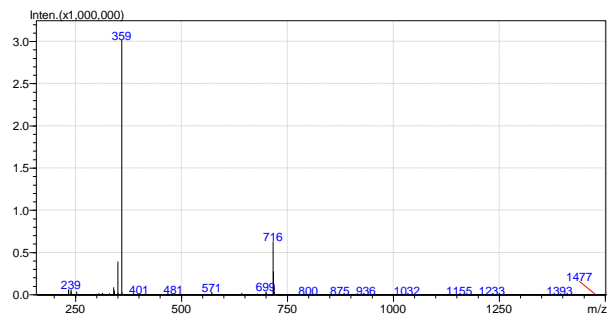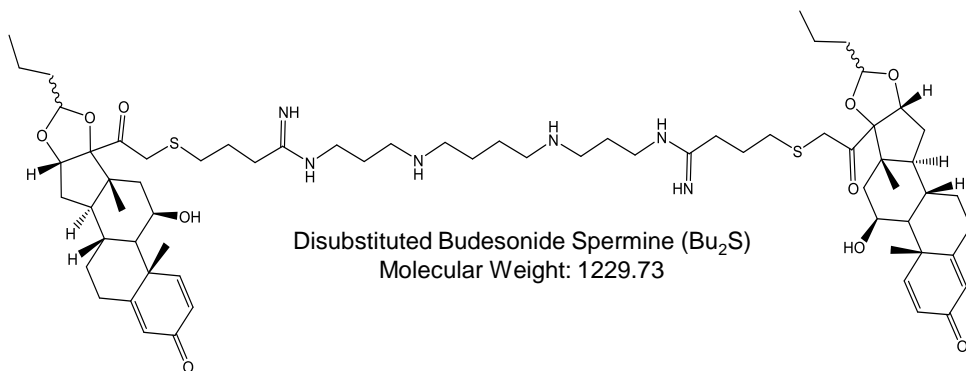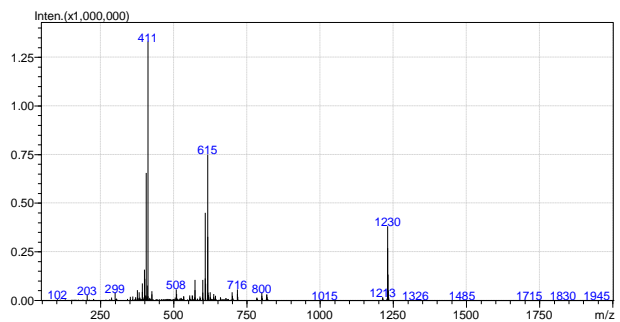

Supplement: NIHMS689743-supplement-2.pdf [file NIHMS689743-supplement-2.pdf]

FluS(mm).1.1.1r

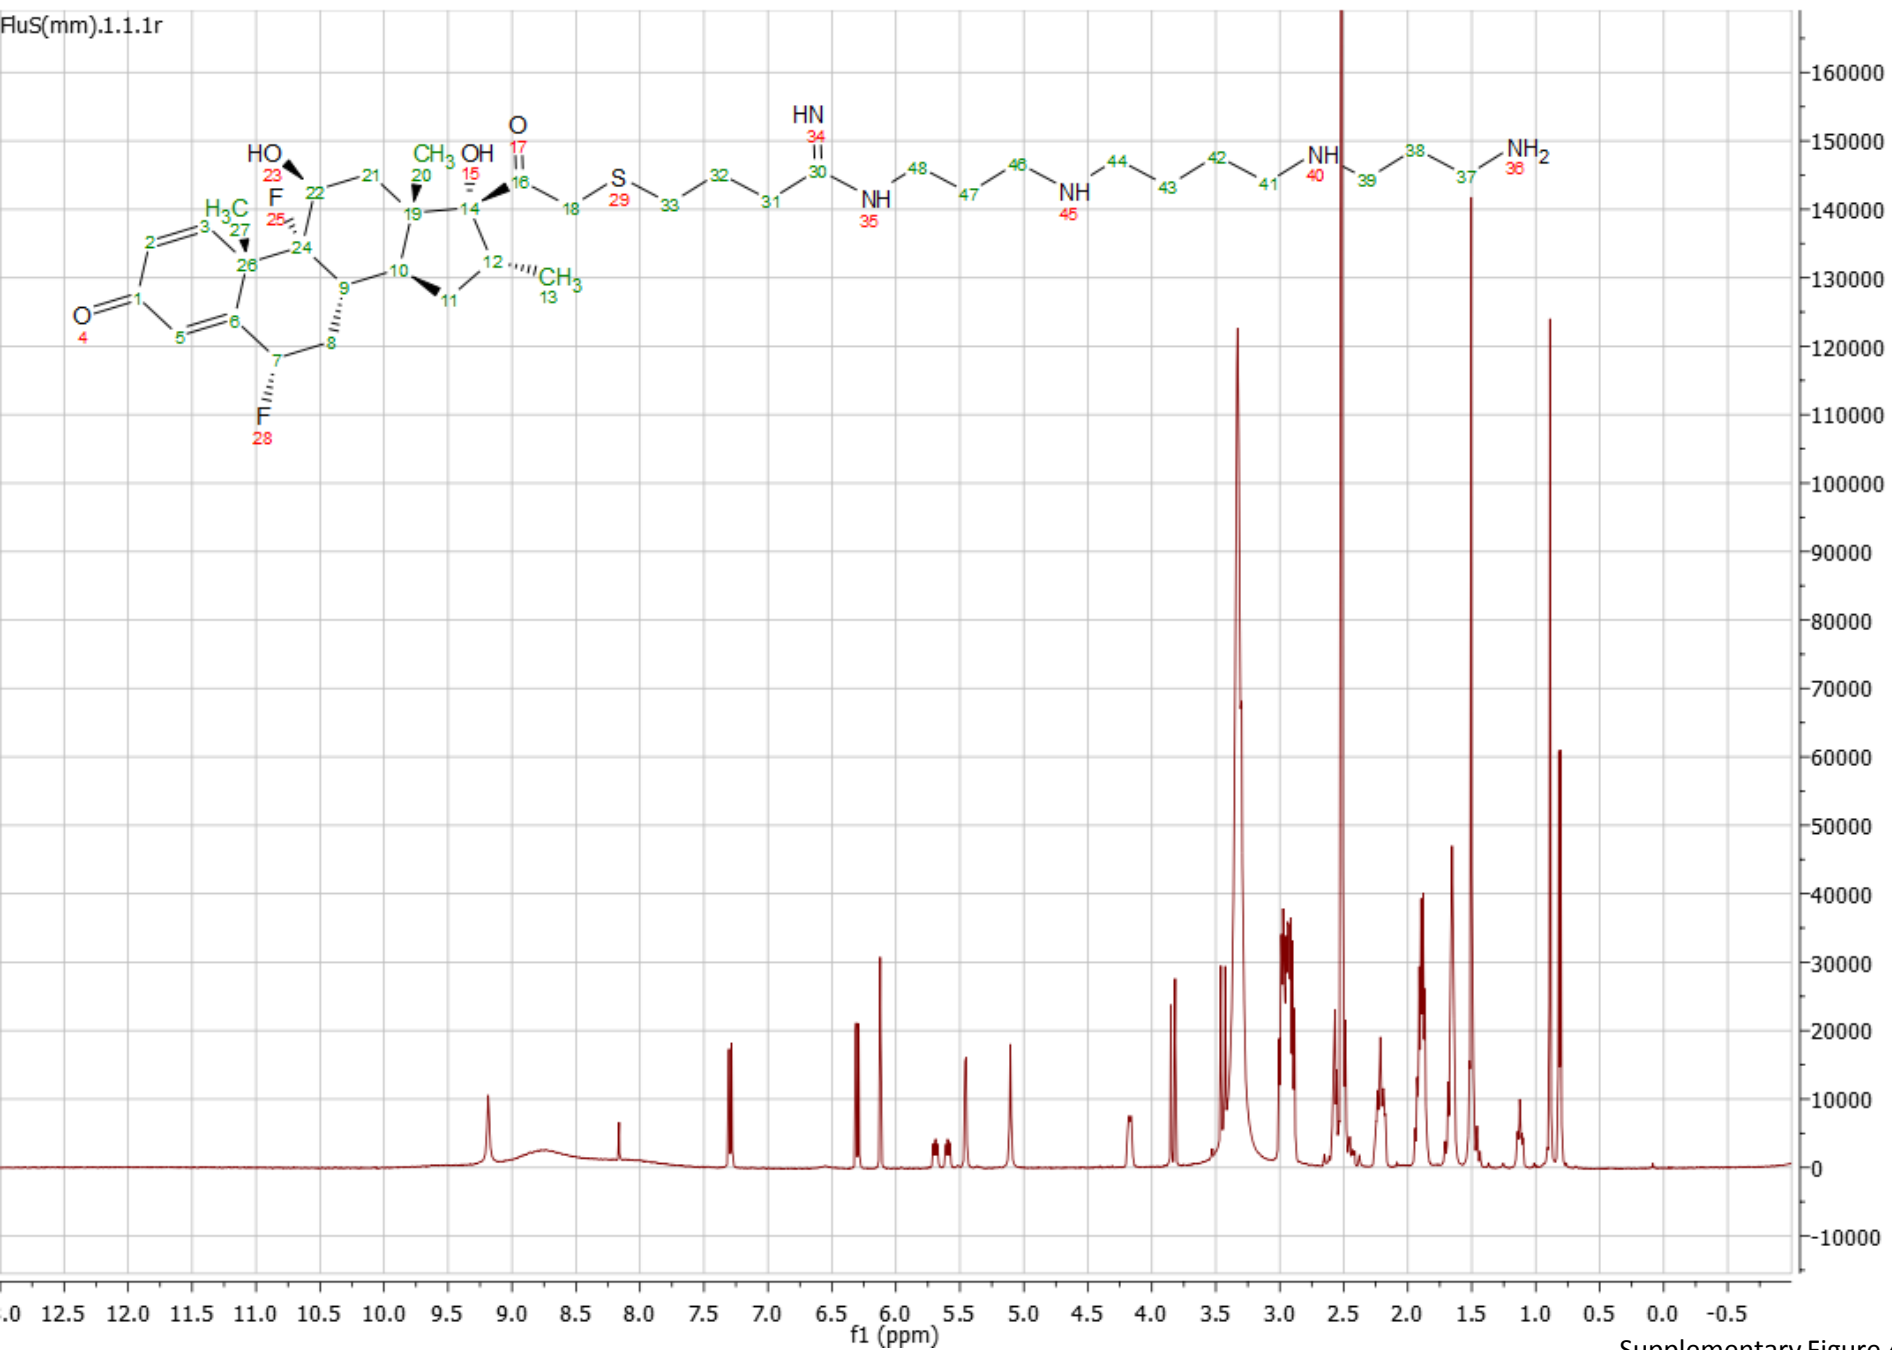

Supplement: NIHMS689743-supplement-4.pdf [file NIHMS689743-supplement-4.pdf]

MestReNova.1.1.1r  
1H NMR

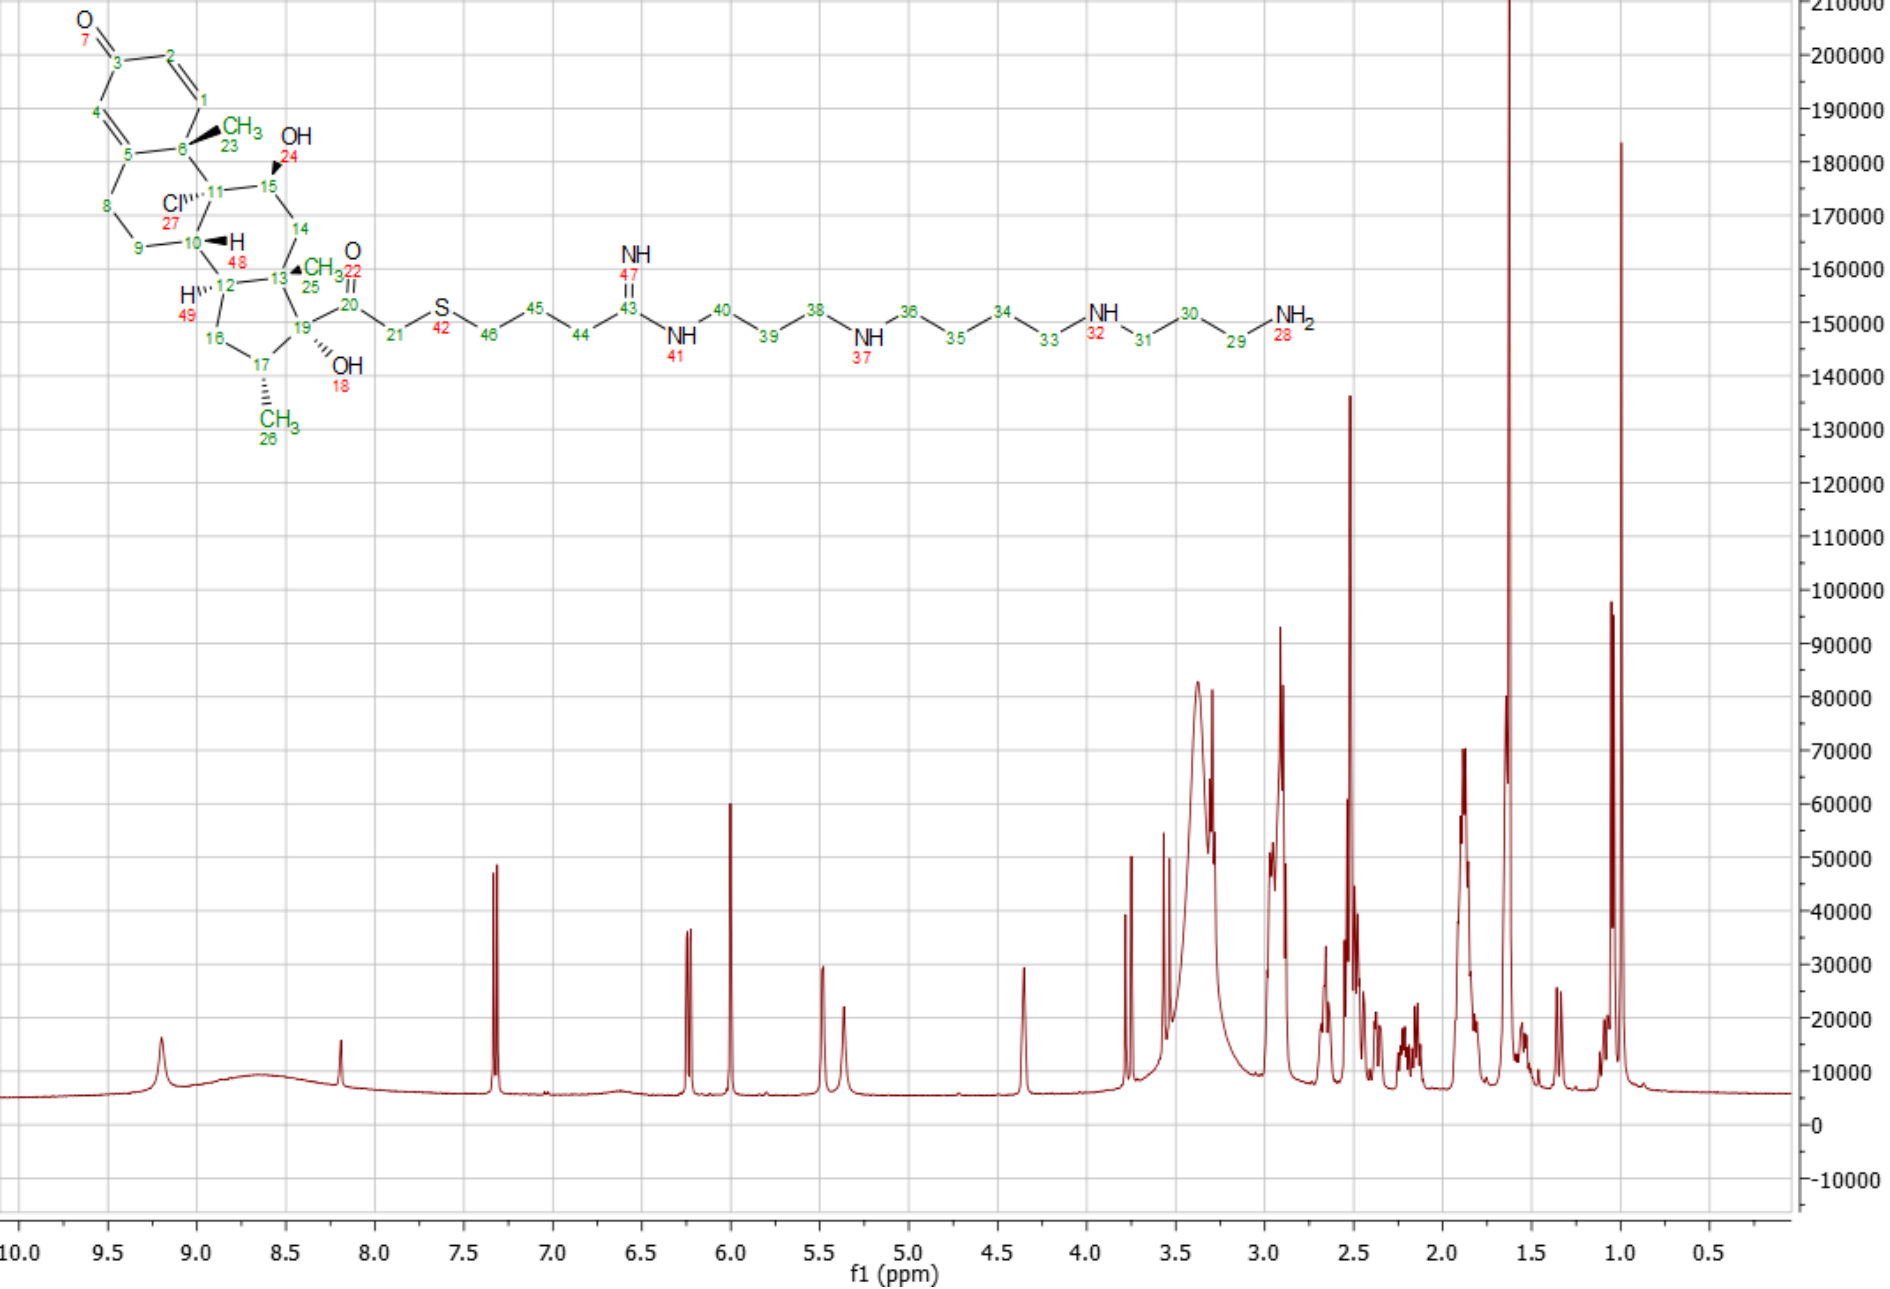

Supplement: NIHMS689743-supplement-8.pdf [file NIHMS689743-supplement-8.pdf]

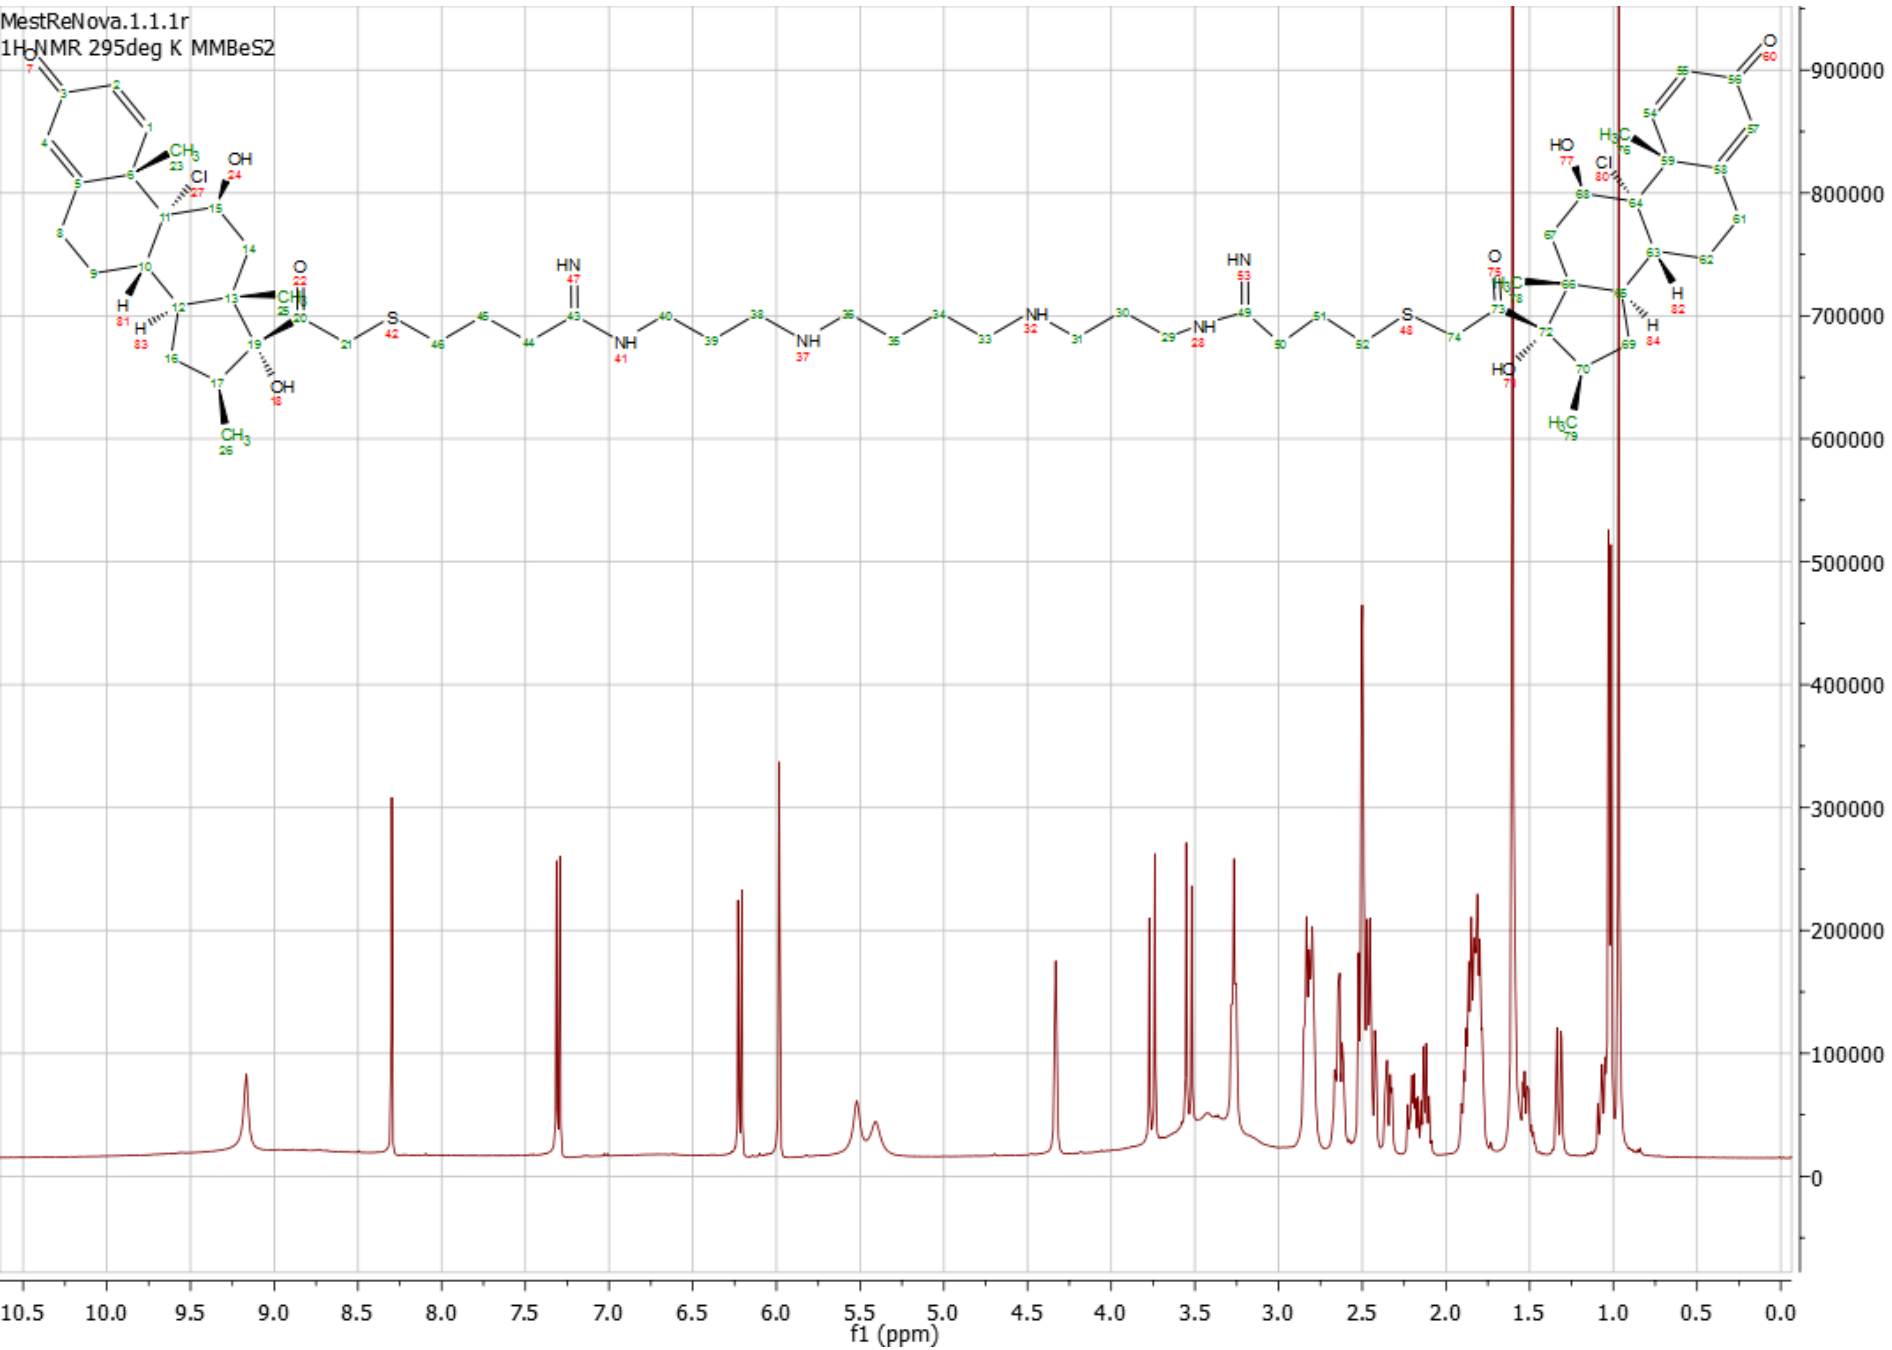

Supplement: NIHMS689743-supplement-9.pdf [file NIHMS689743-supplement-9.pdf]
